# Supplementary material for: Auxetic and multiferroic MP5 (M = Al, Ga): a novel 2D material with negative Possion's ratio and high anisotropic carrier mobility
Source: Royal Society of Chemistry journal article supplement (doi:10.1039/d3cp04301k), 2023-01-01
Supplement: d3cp04301k1.pdf [file d3cp04301k1.pdf]

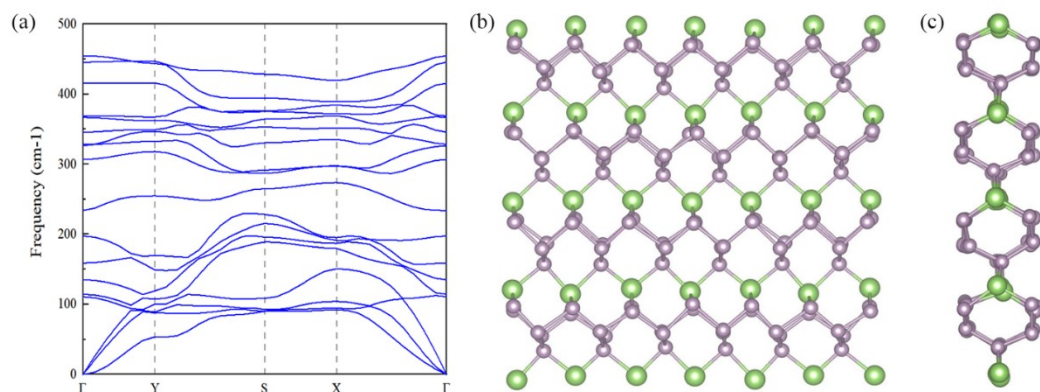

**Figure S1.** (a) Phonon spectra of monolayer GaP<sub>5</sub>. The (b) top and (c) side views of the snapshots from the AIMD simulation for monolayer GaP<sub>5</sub>.

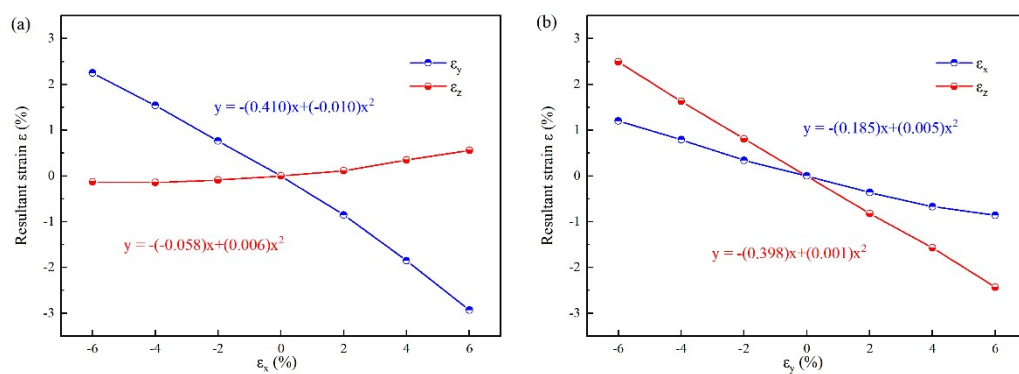

**Figure S2.** Mechanical response of monolayer GaP<sub>5</sub> under uniaxial strain along the (a) x-direction and y-direction.

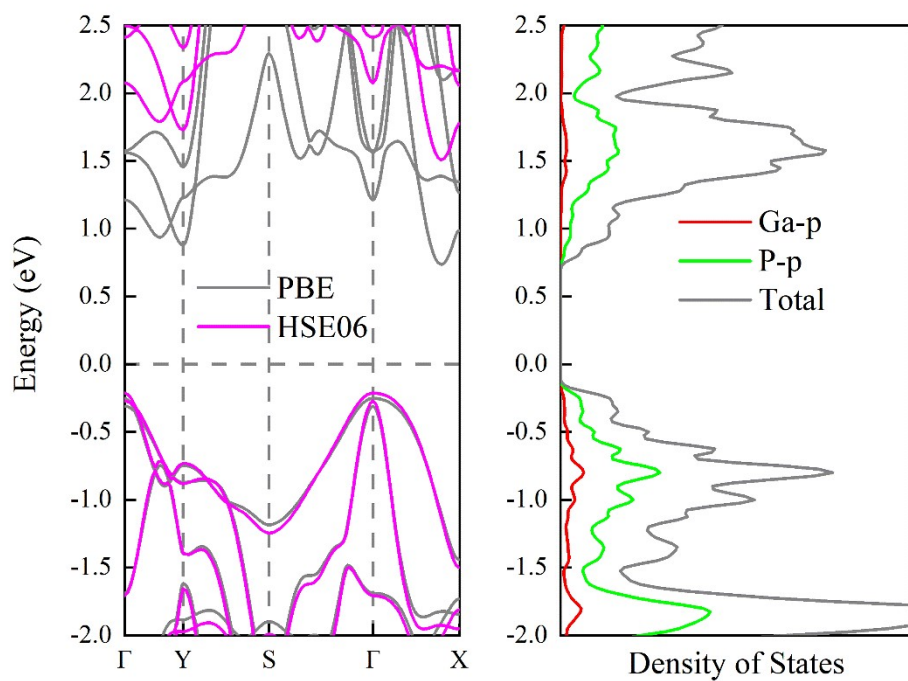

**Figure 6.** The band structure (PBE and HSE06) and density of states of monolayer GaP<sub>5</sub>.
